# Supplementary material
Source: PubMed Central journal article supplement (PMC6445790)

**Overall Survival – Newly Diagnosed**

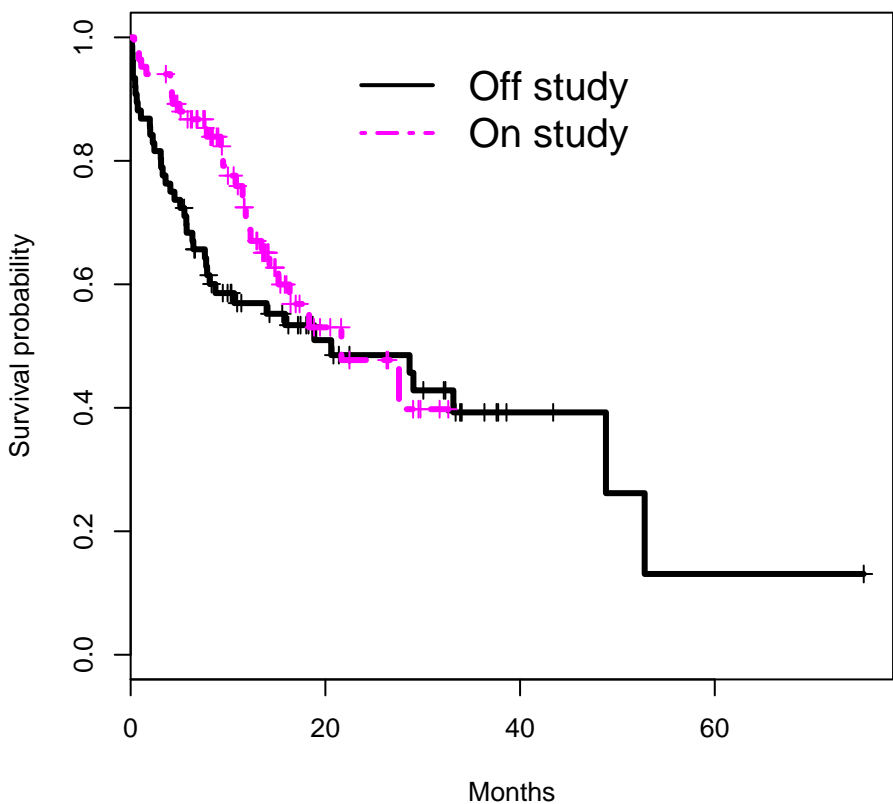

**Relapse-free Survival – Newly Diagnosed**

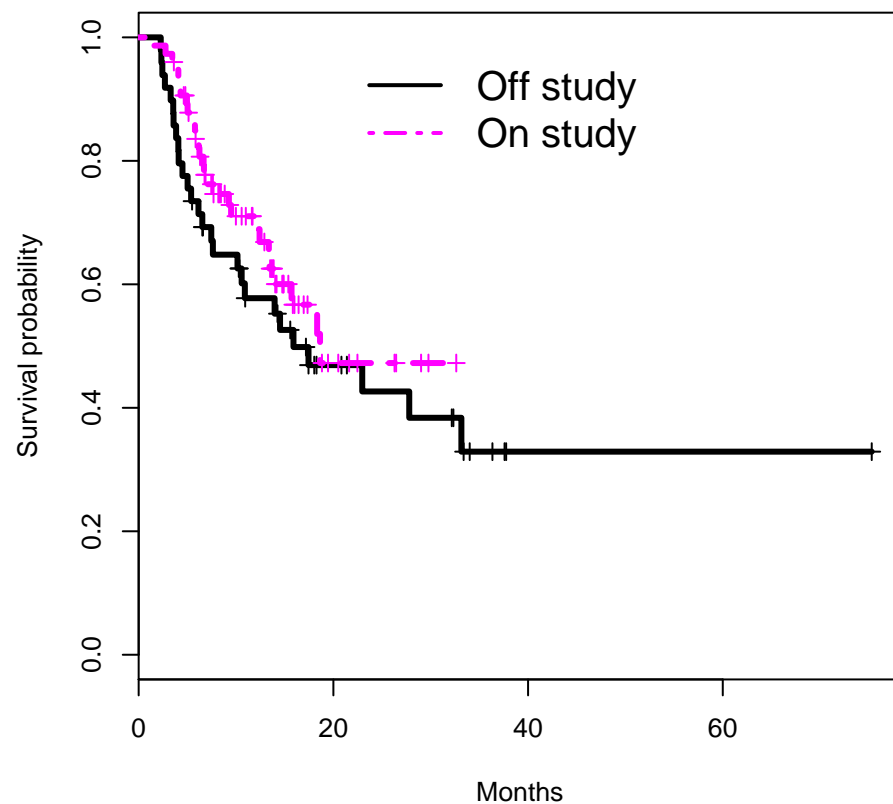

**Overall Survival – Relapsed/Refractory**

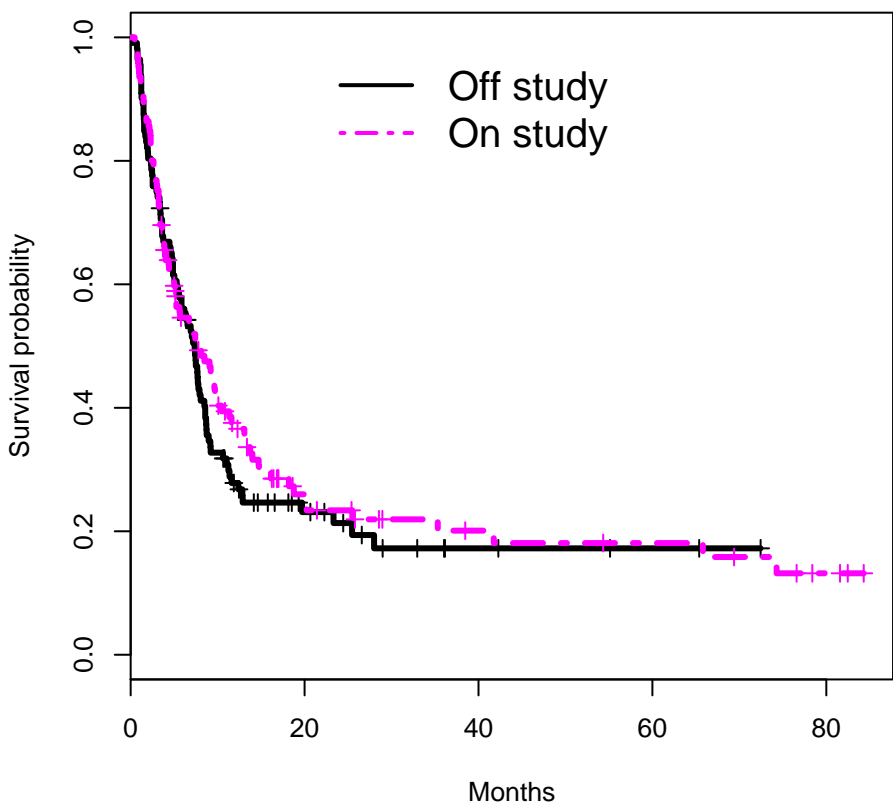

**Relapse-free Survival – Relapsed/Refractory**

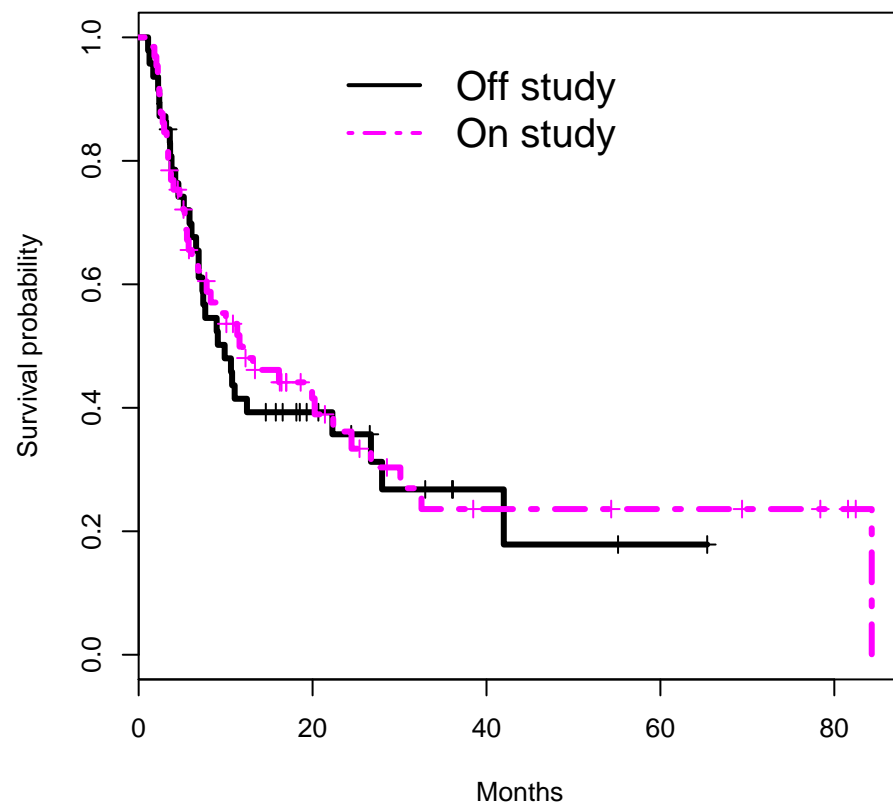

Supplement: NIHMS1515664-supplement-Supp1.pdf [file NIHMS1515664-supplement-Supp1.pdf]
